# Supplementary material for: Radiographic Assessment of Pediatric Condylar Fractures after Conservative Treatment with Functional Appliances—A Systematic Review
Source: PubMed Central journal article supplement (PMC7763300; doi:10.3390/ijerph17249204), 2020-12-09
Supplement: ijerph-17-09204-s001.pdf [file ijerph-17-09204-s001.pdf]

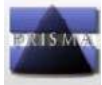

# PRISMA 2009 Checklist

| Section/topic                      | #  | Checklist item                                                                                                                                                                                                                                                                                              | Reported on page # |
|------------------------------------|----|-------------------------------------------------------------------------------------------------------------------------------------------------------------------------------------------------------------------------------------------------------------------------------------------------------------|--------------------|
| <b>TITLE</b>                       |    |                                                                                                                                                                                                                                                                                                             |                    |
| Title                              | 1  | Identify the report as a systematic review, meta-analysis, or both.                                                                                                                                                                                                                                         | 1                  |
| <b>ABSTRACT</b>                    |    |                                                                                                                                                                                                                                                                                                             |                    |
| Structured summary                 | 2  | Provide a structured summary including, as applicable: background; objectives; data sources; study eligibility criteria, participants, and interventions; study appraisal and synthesis methods; results; limitations; conclusions and implications of key findings; systematic review registration number. | 1                  |
| <b>INTRODUCTION</b>                |    |                                                                                                                                                                                                                                                                                                             |                    |
| Rationale                          | 3  | Describe the rationale for the review in the context of what is already known.                                                                                                                                                                                                                              | 2                  |
| Objectives                         | 4  | Provide an explicit statement of questions being addressed with reference to participants, interventions, comparisons, outcomes, and study design (PICOS).                                                                                                                                                  | 3                  |
| <b>METHODS</b>                     |    |                                                                                                                                                                                                                                                                                                             |                    |
| Protocol and registration          | 5  | Indicate if a review protocol exists, if and where it can be accessed (e.g., Web address), and, if available, provide registration information including registration number.                                                                                                                               | 3                  |
| Eligibility criteria               | 6  | Specify study characteristics (e.g., PICOS, length of follow-up) and report characteristics (e.g., years considered, language, publication status) used as criteria for eligibility, giving rationale.                                                                                                      | 3                  |
| Information sources                | 7  | Describe all information sources (e.g., databases with dates of coverage, contact with study authors to identify additional studies) in the search and date last searched.                                                                                                                                  | 3                  |
| Search                             | 8  | Present full electronic search strategy for at least one database, including any limits used, such that it could be repeated.                                                                                                                                                                               | Suppl 2            |
| Study selection                    | 9  | State the process for selecting studies (i.e., screening, eligibility, included in systematic review, and, if applicable, included in the meta-analysis).                                                                                                                                                   | 3                  |
| Data collection process            | 10 | Describe method of data extraction from reports (e.g., piloted forms, independently, in duplicate) and any processes for obtaining and confirming data from investigators.                                                                                                                                  | 3                  |
| Data items                         | 11 | List and define all variables for which data were sought (e.g., PICOS, funding sources) and any assumptions and simplifications made.                                                                                                                                                                       | 3                  |
| Risk of bias in individual studies | 12 | Describe methods used for assessing risk of bias of individual studies (including specification of whether this was done at the study or outcome level), and how this information is to be used in any data synthesis.                                                                                      | 3                  |
| Summary measures                   | 13 | State the principal summary measures (e.g., risk ratio, difference in means).                                                                                                                                                                                                                               | NA                 |
| Synthesis of results               | 14 | Describe the methods of handling data and combining results of studies, if done, including measures of consistency (e.g., I <sup>2</sup> ) for each meta-analysis.                                                                                                                                          | NA                 |



# PRISMA 2009 Checklist

| Section/topic                 | #  | Checklist item                                                                                                                                                                                           | Reported on page # |
|-------------------------------|----|----------------------------------------------------------------------------------------------------------------------------------------------------------------------------------------------------------|--------------------|
| Risk of bias across studies   | 15 | Specify any assessment of risk of bias that may affect the cumulative evidence (e.g., publication bias, selective reporting within studies).                                                             | NA                 |
| Additional analyses           | 16 | Describe methods of additional analyses (e.g., sensitivity or subgroup analyses, meta-regression), if done, indicating which were pre-specified.                                                         | NA                 |
| <b>RESULTS</b>                |    |                                                                                                                                                                                                          |                    |
| Study selection               | 17 | Give numbers of studies screened, assessed for eligibility, and included in the review, with reasons for exclusions at each stage, ideally with a flow diagram.                                          | 4                  |
| Study characteristics         | 18 | For each study, present characteristics for which data were extracted (e.g., study size, PICOS, follow-up period) and provide the citations.                                                             | 4                  |
| Risk of bias within studies   | 19 | Present data on risk of bias of each study and, if available, any outcome level assessment (see item 12).                                                                                                | 4,6                |
| Results of individual studies | 20 | For all outcomes considered (benefits or harms), present, for each study: (a) simple summary data for each intervention group (b) effect estimates and confidence intervals, ideally with a forest plot. | NA                 |
| Synthesis of results          | 21 | Present results of each meta-analysis done, including confidence intervals and measures of consistency.                                                                                                  | NA                 |
| Risk of bias across studies   | 22 | Present results of any assessment of risk of bias across studies (see Item 15).                                                                                                                          | NA                 |
| Additional analysis           | 23 | Give results of additional analyses, if done (e.g., sensitivity or subgroup analyses, meta-regression [see Item 16]).                                                                                    | NA                 |
| <b>DISCUSSION</b>             |    |                                                                                                                                                                                                          |                    |
| Summary of evidence           | 24 | Summarize the main findings including the strength of evidence for each main outcome; consider their relevance to key groups (e.g., healthcare providers, users, and policy makers).                     | 6                  |
| Limitations                   | 25 | Discuss limitations at study and outcome level (e.g., risk of bias), and at review-level (e.g., incomplete retrieval of identified research, reporting bias).                                            | 7                  |
| Conclusions                   | 26 | Provide a general interpretation of the results in the context of other evidence, and implications for future research.                                                                                  | 7                  |
| <b>FUNDING</b>                |    |                                                                                                                                                                                                          |                    |
| Funding                       | 27 | Describe sources of funding for the systematic review and other support (e.g., supply of data); role of funders for the systematic review.                                                               | 9                  |

From: Moher D, Liberati A, Tetzlaff J, Altman DG, The PRISMA Group (2009). Preferred Reporting Items for Systematic Reviews and Meta-Analyses: The PRISMA Statement. PLoS Med 6(7): e1000097. doi:10.1371/journal.pmed1000097

For more information, visit: [www.prisma-statement.org](http://www.prisma-statement.org).

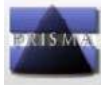

# PRISMA 2009 Checklist

Table 2. Full electronic search strategy.

| Database       | Search Strategy                                                                                                                                                                                                                                                                                                                                                                                                                                                                                                                                                                                                                                                                                                                                                                                                                                                                                                                                                                                                                                                                                                                                                                                                                                                                                                                    |
|----------------|------------------------------------------------------------------------------------------------------------------------------------------------------------------------------------------------------------------------------------------------------------------------------------------------------------------------------------------------------------------------------------------------------------------------------------------------------------------------------------------------------------------------------------------------------------------------------------------------------------------------------------------------------------------------------------------------------------------------------------------------------------------------------------------------------------------------------------------------------------------------------------------------------------------------------------------------------------------------------------------------------------------------------------------------------------------------------------------------------------------------------------------------------------------------------------------------------------------------------------------------------------------------------------------------------------------------------------|
| Pubmed<br>MeSh | ((((((((Mandibular Fractures * (All Fields)) OR Craniocerebral trauma * (All Fields)) OR Jaw diseases * (All Fields)) OR Jaw * (All Fields)) OR Dental Occlusion, Traumatic * (All Fields))) AND (((((((Jaw Fixation Techniques * (All Fields)) OR Diet * (All Fields)) OR diet therapy * (All Fields)) OR Pharmacologic Actions * (All Fields)) OR Occlusal Splints * (All Fields)) OR Orthodontics * (All Fields)) OR Dental Health Services * (All Fields)) OR Myofunctional Therapy * (All Fields)) OR Conservative treatment * (All Fields))) AND (((((((Facial Asymmetry * (All Fields)) OR Fracture Healing * (All Fields)) OR Temporomandibular ankylosis * (All Fields)) OR Temporomandibular Joint Disorders * (All Fields)) OR (Growth and development * (All Fields)))) OR Dental Occlusion * (All Fields)) OR Jaw Relation Record * (All Fields)) OR Mouth Rehabilitation * (All Fields)) OR Pain Measurement * (All Fields)) OR Quality of Life * (All Fields)) OR treatment outcomes * (All Fields)) OR evaluation * (All Fields)) OR Malocclusion * (All Fields))) AND (((child * (All Fields)) OR Adult Children *(All Fields)) OR adolescent * (All Fields))) AND (((Observational Study [Publication Type]) OR Clinical Trial [Publication Type]) OR epidemiologic studies) OR Case Reports [Publication Type]) |
| Scopus         | (Mandibular Fractures OR Craniocerebral trauma OR Jaw diseases OR Jaw OR Dental Occlusion, Traumatic) AND (Jaw Fixation Techniques OR Diet OR diet therapy OR Pharmacologic Actions OR Occlusal Splints OR Orthodontics OR Dental Health Services OR Myofunctional Therapy OR Conservative treatment) AND (Facial Asymmetry OR Fracture Healing OR Temporomandibular ankylosis OR Temporomandibular Joint Disorders OR Growth and development OR Dental Occlusion OR Jaw Relation Record OR Mouth Rehabilitation OR Pain Measurement OR Quality of Life OR treatment outcomes OR evaluation OR Malocclusion) AND (child OR Adult Children OR adolescent) AND (Observational Study OR Clinical Trial OR epidemiologic studies OR Case Reports)                                                                                                                                                                                                                                                                                                                                                                                                                                                                                                                                                                                      |
| Web of Science | (TS =( Mandibular Fractures * OR Craniocerebral trauma * OR Jaw diseases * OR Jaw * OR Dental Occlusion, Traumatic *) AND TS = (jaw fixation techniques * OR diet * OR diet therapy * OR pharmacologic actions * OR occlusal splints * OR orthodontics * OR dental health services * OR myofunctional therapy * OR conservative treatment *)) AND (TS = (facial asymmetry * OR fracture healing * OR temporomandibular ankylosis * OR temporomandibular joint disorders * OR growth and development * OR dental occlusion * OR jaw relation record * OR mouth and rehabilitation * OR pain and measurement * OR quality of life * OR treatment outcomes * OR evaluation * OR malocclusion *) TS = (child * OR adult children * OR adolescent * )) AND (TS = (observational study * OR clinical trial * OR epidemiologic studies * OR case reports *))                                                                                                                                                                                                                                                                                                                                                                                                                                                                              |
| EBSCO<br>MeSh  | (Mandibular Fractures OR Head Injuries OR Jaw Diseases OR Jaw) AND (Jaw Fixation Techniques OR Diet OR Diet Therapy/DH OR Drug Therapy/DT OR Splints OR Orthodontics OR Dental Health Services OR Manual Therapy Fracture Healing OR Ankylosis OR Temporomandibular Joint Diseases OR Growth and Development (Iowa NOC) OR Dental Occlusion OR Occlusion Effect OR Rehabilitation OR Pain Measurement OR Quality of Life OR Treatment Outcomes OR Evaluation OR Malocclusion) AND (Child OR Adult Children OR Adolescence) AND (Experimental Studies OR Nonexperimental Studies OR Epidemiological Research OR Case Studies)                                                                                                                                                                                                                                                                                                                                                                                                                                                                                                                                                                                                                                                                                                       |
